# Supplementary material for: Mining Beneficial Genes for Salt Tolerance From a Core Collection of Rice Landraces at the Seedling Stage Through Genome-Wide Association Mapping
Source: Front Plant Sci. 2022 Apr 26;13:847863. doi: 10.3389/fpls.2022.847863 (PMC9087808; doi:10.3389/fpls.2022.847863)
Supplement: Supplementary file 1 [file Table_1.XLSX]

## Sheet: Table S1
Table S1 Description statistics for the eight traits related to ST
Traits	Mean ± SD	Range	CV (%)
Root Na+ concentration (µmol/mg)	32.38 ± 20.29	5.07 - 91.24	62.66
Shoot K+ concentration (µmol/mg)	15.15 ± 12.22	0.59 - 43.65	80.66
Shoot Na+ concentration (µmol/mg)	19.19 ± 15.45	2.24 - 77.19	80.51
Ratio of Na+ to K+ concentrations in roots	21.55 ± 22.37	0.80 - 98.59	103.81
Relative total root length (%)	0.94 ± 0.27	0.43 - 1.66	28.72
Relative total root surface area (%)	0.93 ± 0.23	0.44 - 1.78	24.73
Relative total root volume (%)	0.96 ± 0.26	0.1 - 1.93	27.08
Relative ratio of Na+ to K+ concentrations in shoots (%)	5.97 ± 1.98	0.14 - 51.55	33.17
