# Supplementary material for: Mining Beneficial Genes for Salt Tolerance From a Core Collection of Rice Landraces at the Seedling Stage Through Genome-Wide Association Mapping
Source: Front Plant Sci. 2022 Apr 26;13:847863. doi: 10.3389/fpls.2022.847863 (PMC9087808; doi:10.3389/fpls.2022.847863)
Supplement: Supplementary file 3 [file Table_3.XLSX]

## Sheet: Table S4
Table S4. Comparison of QTL detected in this study with reported salt tolerance genes and QTL
QTL	Chromosome	No.of Associated SNPs	Position/interval (Mbp)	-Log10(p)	R2(%)	Known genes	References		Known QTL	References
qSNC1.1	1	1	2068818	7.6603e-05	0.18842	OsRAV2,HSP17.0	Duan et al.2016,Ham et al.2013		qRDWn1.1(root dry weight)	Leila et al.2021
qSNC1.2	1	1	16206011	2.4144e-05	0.19564
qSNC1.3	1	1	17026993	2.288e-05	0.19783
qRN/K1.1	1	17	12981168	1.22e-05	0.13748
			13341650	0.0001	0.19825
qRN/K1.2	1	1	14557730	8.24e-06	0.2774
qRSN/K1.1	1	1	13325224	9.0001e-05	0.16917
qRTRL1.1	1	72	18009870	2.5298e-06	0.16861	OsMEK1	Qi et al.2002
			18261651	9.5554e-05	0.28114
qRTRSA1	1	1	18217393	3.8719e-05	0.15605
qRSN/K1.3	1	10	23859237	6.0109e-05	0.1393
			23876108	9.2881e-05	0.15282
qRNC1	1	7	23280906	8.8918e-06	0.169				qRDWs1.1(root dry weight)	Leila et al.2021
			24033346	8.0992e-05	0.21194
qRSN/K1.4	1	2	30835192	9.771e-05	0.19136	OsHsfC1b	Romy et al.2012
			30835647	9.3297e-05	0.19161
qRSN/K1.5	1	1	38428905	1.4024e-05	0.20296	OsNAC6	Chung et al.2009		qSLST1( shoot length under salt treatment ) qRDSW1(relative dry shoot weight), qRB1(relative bio- mass)	Zhang et al.2020
qRSN/K1.2	1	1	40176732	1.2935e-05	0.20663				qSIS1( salt injury score), qSNaC1.2(shoot Na+ concentration)	Chen et al.2020
qSNC2	2	34	6179010	1.3144e-05	0.212	OsGIRL1	Park et al.2014		qRRDW2( relative root dry weight )	Chen et al.2020
			6214413	2.7729e-05	0.23191
qRSN/K2	2	3	33518871	2.7729e-05	0.18121	OsEREBP1	Jisha et al.2017
			33931871	6.4416e-05	0.19617
qSNC3.1	3	1	6884892	8.782e-05	0.1877	DSM3	Du et al.2011
qRTRV3.1	3	1	2062847	6.6152e-05	0.16107	ONAC022	Hong et al.2016
qRTRV3.2	3	4	2666730	8.8186e-05	0.13592	OsAP23	Zhuang et al.2013
			2669892	9.4504e-05	0.13694
qRSN/K3	3	1	4147706	9.9636e-05	0.13728	OsJAZ9	Wu et al.2015
qSNC3.2	3	19	26087649	2.8904e-05	0.18201
			26263607	9.3338e-05	0.22142
qRNC3	3	3	22301622	8.8742e-05	0.16604
			22301645	8.9619e-05	0.16533
qRN/K3.1	3	1	19777237	7.24e-05	0.17267
qRN/K3.2	3	1	1098135	7.26e-05	0.18802
qRSN/K4	4	1	20247062	8.1431e-05	0.17129
qRSN/K5	5	1	939266	1.9022e-05	0.18403
qRN/K5	5	5	5586882	6.77e-06	0.1872	OsTZF1	Jan et al.2013
			5983995	3.85e-05	0.2258
qRNC5	5	2	7128403	6.1765e-05	0.17787	OsCYP51G3，OsPYL	Xia et al.2015,Tian et al.2015
			7128411	6.1765e-05	1.17787
qSNC5	5	6	8019171	2.4603e-05	0.17813
			8142781	9.3358e-05	0.19642
qRTRV6.3	6	2	18974706	2.6055e-05	0.17385
			19446968	8.2948e-05	0.20524
qRTRV6.2	6	9	17714670	5.5054e-05	0.13597
			17931363	9.7684e-05	0.14654
qRTRV6.1	6	3	1160147	6.341e-05	0.13921	OsSIK1	Ouyang et al.2010
			1579437	8.7318e-05	0.18258
qSNC6	6	2	28930159	5.1975e-05	0.15644
			29008148	6.5287e-05	0.15684
qRN/K6	6	2	28822519	6.9293e-05	0.17489
			28822537	6.9293e-05	0.17489
qSKC6	6	10	28761880	1.9622e-05	0.14382	OsSIDP366	Guo et al.2016
			29010785	9.0537e-05	0.17939
qSNC7.1	7	9	23950945	8.4955e-06	0.1757
			24382622	9.838e-05	0.23615
qSNC7.2	7	1	21434777	8.8489e-05	0.14853
qRTRSA7	7	379	25301781	1.1506e-05	0.14692	OsSAPK2	Xu et al.2013
			25803869	8.8274e-05	0.23097
qRNC8.1	8	1	223019	9.5025e-05	0.16429
qRNC8.2	8	1	9371390	9.5025e-05	0.15322
qRN/K8	8	1	17641169	3.8671e-05	0.19587				qRFWn8.1(root fresh weight)	Leila et al.2021
qRTRV8	8	1	23328371	5.9046e-05	0.176
qRSN/K8	8	1	22966689	7.6484e-05	0.17687
qSKC8	8	1	25120429	9.3327e-05	0.16775	OsDOG,OsXylT	Giri et al.2011,Takano.2015		qRSKC8(Relative shoot K+ concentration), qRNaC8(root Na+ concentration)	Chen et al.2020
qRSN/K9.1	9	6	9341076	2.7516e-05	0.17618
			9565221	7.9483e-05	0.21127
qRNC9	9	1	7440462	3.479e-06	0.23957	OsMYBc	Wang et al.2015		qDSW9(dry shoot weight), qBST9(biomass under salt treatment )	Zhang et al.2020
qRSN/K9.2	9	19	10124507	3.0576e-05	0.13669
			11064728	0.00010002	0.18471
qRTRSA9	9	4	15458096	3.9425e-05	0.14328
			15461325	5.9294e-05	0.15415
qSNC9	9	4	15831082	3.773e-05	0.1409	OsDSG1,OsBIERF1	Park et al.2010,Cao et al.2006		qRL-R9.1(root length)	Leila et al.2021
			15863917	9.5981e-05	0.18124
qRTRV9	9	63	15436209	2.225e-05	0.13473
			15535345	9.9363e-05	0.17138
qRSN/K9.3	9	2	19512797	1.3763e-05	0.17463
			19518843	9.7733e-05	0.21138
qRN/K9	9	9	19500722	2.8627e-05	0.16649
			19549022	9.3853e-05	0.19531
qRN/K10	10	1	3546909	4.6731e-05	0.22396
qRNC10	10	2	17942896	4.7044e-05	0.14833
			17959818	6.821e-05	0.15329
qRTRSA10	10	1	15994615	5.4038e-05	0.15014
qRTRSA11	11	2	19209445	6.3126e-05	0.1434
			19228131	6.9549e-05	0.14604
qSNC11.1	11	1	19411848	2.9134e-05	0.19191
qRN/K11	11	1	23360595	9.0232e-05	0.1466
qSNC11.2	11	61	26916789	2.9108e-06	0.1437	OsJAMyb	Yang et al.2020
			27492734	9.8627e-05	0.21421
qRTRV11	11	15	26331143	5.407e-05	0.17217
			26376645	9.8897e-05	0.18838
qRTRL12.1	12	8	12549151	3.4866e-05	0.14455				qSLn12.1(shoot length)	Leila et al.2021
			12917897	9.3055e-05	0.16806
qRTRL12.2	12	4	13773607	4.5318e-05	0.1466
			14004504	5.8898e-05	0.15773
qRTRL12.3	12	1	16279897	4.6568e-05	0.18877
qRTRL12.4	12	1	17214689	1.8744e-05	0.18527				qRDWs12.1(root dry weight)	Leila et al.2021
qSNC12	12	2	15113812	7.1611e-05	0.13914
			15216391	9.2815e-05	0.14267
qRNC12	12	1	18327418	2.7128e-05	0.19792				qRFWs12.1(root fresh weight)	Leila et al.2021
