# Supplementary material for: Mining Beneficial Genes for Salt Tolerance From a Core Collection of Rice Landraces at the Seedling Stage Through Genome-Wide Association Mapping
Source: Front Plant Sci. 2022 Apr 26;13:847863. doi: 10.3389/fpls.2022.847863 (PMC9087808; doi:10.3389/fpls.2022.847863)
Supplement: Supplementary file 4 [file Table_4.XLSX]

## Sheet: Table S5
Table S5. Genes in the candidate interval
Chr	From	To	Locus Name	Description
6	28752549	28757410	LOC_Os06g47470	TKL_IRAK_DUF26-lh.2 - DUF26 kinases have homology to DUF26 containing loci, expressed
6	28758887	28759375	LOC_Os06g47480	expressed protein
6	28759949	28761041	LOC_Os06g47490	expressed protein
6	28762360	28762870	LOC_Os06g47500	retrotransposon protein, putative, Ty3-gypsy subclass
6	28763054	28766010	LOC_Os06g47510	retrotransposon protein, putative, Ty3-gypsy subclass
6	28768494	28771067	LOC_Os06g47520	expressed protein
6	28769505	28774431	LOC_Os06g47530	TKL_IRAK_DUF26-lh.6 - DUF26 kinases have homology to DUF26 containing loci, expressed
6	28777681	28779892	LOC_Os06g47540	expressed protein
6	28787764	28788344	LOC_Os06g47544	expressed protein
6	28789015	28797545	LOC_Os06g47550	cadmium/zinc-transporting ATPase, putative, expressed
6	28799017	28799513	LOC_Os06g47560	expressed protein
6	28801751	28804726	LOC_Os06g47570	PPR repeat containing protein, expressed
6	28806701	28816144	LOC_Os06g47580	REV1, putative, expressed
6	28818162	28819180	LOC_Os06g47590	AP2 domain containing protein, expressed
6	28825830	28827036	LOC_Os06g47600	thaumatin family domain containing protein, expressed
6	28830640	28831503	LOC_Os06g47610	transposon protein, putative, unclassified, expressed
6	28831589	28837128	LOC_Os06g47620	peptidase, putative, expressed
6	28846112	28846936	LOC_Os06g47630	expressed protein
6	28847257	28848022	LOC_Os06g47640	OsCML29 - Calmodulin-related calcium sensor protein, expressed
6	28853371	28856936	LOC_Os06g47650	phytosulfokine receptor precursor, putative, expressed
6	28857672	28858259	LOC_Os06g47670	hypothetical protein
6	28859088	28860392	LOC_Os06g47680	OsFBX205 - F-box domain containing protein, expressed
6	28863875	28864998	LOC_Os06g47690	expressed protein
6	28867475	28871006	LOC_Os06g47700	serine/threonine-protein kinase BRI1-like 2 precursor, putative, expressed
6	28872387	28873805	LOC_Os06g47710	eucine-rich repeat receptor-like kinase, putative, expressed
6	28874838	28878068	LOC_Os06g47720	serine/threonine-protein kinase BRI1-like 2 precursor, putative, expressed
6	28881108	28887001	LOC_Os06g47730	retrotransposon protein, putative, Ty1-copia subclass, expressed
6	28888959	28892150	LOC_Os06g47740	phytosulfokine receptor precursor, putative, expressed
6	28898441	28901943	LOC_Os06g47750	phytosulfokine receptor precursor, putative, expressed
6	28905577	28909089	LOC_Os06g47760	phytosulfokine receptor precursor, putative, expressed
6	28910275	28914944	LOC_Os06g47770	expressed protein
6	28918691	28923568	LOC_Os06g47780	TKL_IRAK_DUF26-lh.3 - DUF26 kinases have homology to DUF26 containing loci, expressed
6	28926195	28930077	LOC_Os06g47800	disease resistance protein RGA3, putative, expressed
6	28935216	28939457	LOC_Os06g47810	retrotransposon protein, putative, Ty1-copia subclass, expressed
6	28941271	28943704	LOC_Os06g47820	protein kinase domain containing protein, expressed
6	28946879	28950601	LOC_Os06g47830	RPA2C - Putative single-stranded DNA binding complex subunit 2, expressed
6	28950823	28953456	LOC_Os06g47834	expressed protein
6	28954541	28957840	LOC_Os06g47840	ZOS6-08 - C2H2 zinc finger protein, expressed
6	28958626	28960418	LOC_Os06g47850	zinc finger family protein, putative, expressed
6	28962559	28965940	LOC_Os06g47860	Protein of unknown function
6	28966758	28967624	LOC_Os06g47870	expressed protein
6	28967974	28969110	LOC_Os06g47880	cell division control protein 2 homolog 3, putative, expressed
6	28969488	28974576	LOC_Os06g47890	OsFBO9 - F-box and other domain containing protein, expressed
6	28977492	28980804	LOC_Os06g47900	expressed protein
6	28981124	28983436	LOC_Os06g47910	GDSL-like lipase/acylhydrolase, putative, expressed
6	28985775	28987849	LOC_Os06g47920	pentatricopeptide repeat domain containing protein, putative, expressed
6	28988077	28990335	LOC_Os06g47930	expressed protein
6	28993796	28995033	LOC_Os06g47940	nifU, putative, expressed
6	28995477	28997357	LOC_Os06g47950	tetratricopeptide-like helical, putative, expressed
6	28998828	28999481	LOC_Os06g47960	nucleic acid binding protein, putative, expressed
6	29002132	29003608	LOC_Os06g47970	Protein of unknown function DUF1517 domain containing protein
6	29011061	29011585	LOC_Os06g47980	expressed protein
6	29013147	29019044	LOC_Os06g47990	transposon protein, putative, unclassified, expressed
6	29021793	29023492	LOC_Os06g48000	peroxidase precursor, putative, expressed
6	29027003	29028481	LOC_Os06g48010	peroxidase precursor, putative, expressed
6	29035686	29038299	LOC_Os06g48020	peroxidase precursor, putative, expressed
6	29050768	29054613	LOC_Os06g48030	peroxidase precursor, putative, expressed
6	29059687	29063780	LOC_Os06g48040	zinc finger, C3HC4 type domain containing protein, expressed
6	29068582	29071757	LOC_Os06g48050	expressed protein
6	29072350	29076031	LOC_Os06g48060	ABC transporter, ATP-binding protein, putative, expressed
6	29078353	29080307	LOC_Os06g48065	Zinc finger, C3HC4 type domain containing protein, expressed
6	29086083	29089669	LOC_Os06g48070	retrotransposon protein, putative, Ty3-gypsy subclass, expressed
6	29093082	29094766	LOC_Os06g48080	retrotransposon protein, putative, Ty3-gypsy subclass, expressed
6	29095903	29102041	LOC_Os06g48090	retrotransposon protein, putative, unclassified, expressed
6	29102669	29105811	LOC_Os06g48100	retrotransposon protein, putative, unclassified, expressed
6	29111102	29115616	LOC_Os06g48110	retrotransposon protein, putative, Ty3-gypsy subclass, expressed
6	29115871	29117852	LOC_Os06g48120	retrotransposon protein, putative, Ty3-gypsy subclass
6	29119041	29120854	LOC_Os06g48130	retrotransposon protein, putative, Ty3-gypsy subclass
6	29121166	29124344	LOC_Os06g48140	retrotransposon protein, putative, Ty3-gypsy subclass, expressed
6	29126047	29126379	LOC_Os06g48150	expressed protein
6	29133001	29134771	LOC_Os06g48160	glycosyl hydrolases family 16, putative, expressed
6	29137237	29139250	LOC_Os06g48170	glycosyl hydrolases family 16, putative, expressed
6	29144888	29146562	LOC_Os06g48180	glycosyl hydrolases family 16, putative, expressed
6	29147379	29148622	LOC_Os06g48190	expressed protein
6	29156425	29157883	LOC_Os06g48200	glycosyl hydrolases family 16, putative, expressed
6	29163789	29166834	LOC_Os06g48210	DEAD-box ATP-dependent RNA helicase, putative, expressed
6	29171334	29172170	LOC_Os06g48220	expressed protein
6	29173195	29175608	LOC_Os06g48230	DNA-directed RNA polymerases I, II, and III subunit RPABC3, putative, expressed
6	29175691	29177070	LOC_Os06g48235	expressed protein
6	28682052	28687078	LOC_Os06g47320	T-complex protein, putative, expressed
6	28688794	28694061	LOC_Os06g47330	dynamin family protein, putative, expressed
6	28694851	28698503	LOC_Os06g47340	glycosyltransferase family 43 protein, putative, expressed
6	28699601	28706489	LOC_Os06g47350	glycosyltransferase family 43 protein, putative, expressed
6	28707248	28708381	LOC_Os06g47360	RNA polymerase I specific transcription initiation factor RRN3 family protein, putative, expressed
6	28710013	28712974	LOC_Os06g47370	retrotransposon protein, putative, Ty3-gypsy subclass
6	28713291	28719380	LOC_Os06g47380	retrotransposon protein, putative, Ty3-gypsy subclass, expressed
6	28720939	28721585	LOC_Os06g47390	conserved hypothetical protein
6	28723595	28724356	LOC_Os06g47400	OsFBX204 - F-box domain containing protein, expressed
6	28725241	28726529	LOC_Os06g47410	expressed protein
6	28726645	28728264	LOC_Os06g47420	transposon protein, putative, unclassified, expressed
6	28732632	28734315	LOC_Os06g47430	expressed protein
6	28736300	28738620	LOC_Os06g47440	expressed protein
6	28742344	28742708	LOC_Os06g47450	hypothetical protein
6	28742939	28747112	LOC_Os06g47460	expressed protein
