# Supplementary material for: Mining Beneficial Genes for Salt Tolerance From a Core Collection of Rice Landraces at the Seedling Stage Through Genome-Wide Association Mapping
Source: Front Plant Sci. 2022 Apr 26;13:847863. doi: 10.3389/fpls.2022.847863 (PMC9087808; doi:10.3389/fpls.2022.847863)
Supplement: Supplementary file 5 [file Table_5.XLSX]

## Sheet: Table S6
Table S6. GO enrichment analysis of the genes in candidate region
GO_acc	Term_type	Term	Queryitem	Querytotal	Bgitem	Bgtotal	Pvalue	FDR	Entries
GO:0009719	biological_process	response to endogenous stimulus	19	64	169	23155	4.5e-25	7.5e-23	LOC_Os06g48010 LOC_Os06g47700 LOC_Os06g48065 LOC_Os06g47470 LOC_Os06g48200 LOC_Os06g47590 LOC_Os06g47530 LOC_Os06g47740 LOC_Os06g48160 LOC_Os06g48170 LOC_Os06g47650 LOC_Os06g47760 LOC_Os06g48030 LOC_Os06g48020 LOC_Os06g47750 LOC_Os06g47550 LOC_Os06g47720 LOC_Os06g48000 LOC_Os06g48180
GO:0006950	biological_process	response to stress	24	64	611	23155	1.8e-21	1.5e-19	LOC_Os06g47580 LOC_Os06g47750 LOC_Os06g48180 LOC_Os06g47710 LOC_Os06g47320 LOC_Os06g47640 LOC_Os06g48065 LOC_Os06g47470 LOC_Os06g48200 LOC_Os06g47650 LOC_Os06g47530 LOC_Os06g48160 LOC_Os06g47800 LOC_Os06g48020 LOC_Os06g47820 LOC_Os06g48000 LOC_Os06g47590 LOC_Os06g47700 LOC_Os06g47720 LOC_Os06g47740 LOC_Os06g48170 LOC_Os06g47760 LOC_Os06g48030 LOC_Os06g48010
GO:0050896	biological_process	response to stimulus	27	64	917	23155	3.9e-21	2.2e-19	LOC_Os06g48200 LOC_Os06g47580 LOC_Os06g47750 LOC_Os06g47550 LOC_Os06g48180 LOC_Os06g47710 LOC_Os06g47320 LOC_Os06g47640 LOC_Os06g48065 LOC_Os06g47470 LOC_Os06g48060 LOC_Os06g47650 LOC_Os06g47530 LOC_Os06g48160 LOC_Os06g47800 LOC_Os06g48020 LOC_Os06g47820 LOC_Os06g47600 LOC_Os06g48000 LOC_Os06g47590 LOC_Os06g47700 LOC_Os06g47720 LOC_Os06g47740 LOC_Os06g48170 LOC_Os06g47760 LOC_Os06g48030 LOC_Os06g…
GO:0009605	biological_process	response to external stimulus	12	64	40	23155	1.2e-20	5.1e-19	LOC_Os06g47710 LOC_Os06g47700 LOC_Os06g47320 LOC_Os06g47720 LOC_Os06g48200 LOC_Os06g47650 LOC_Os06g47750 LOC_Os06g47740 LOC_Os06g48160 LOC_Os06g48170 LOC_Os06g47760 LOC_Os06g48180
GO:0009607	biological_process	response to biotic stimulus	9	64	61	23155	2.9e-13	9.7e-12	LOC_Os06g48065 LOC_Os06g48060 LOC_Os06g48010 LOC_Os06g47760 LOC_Os06g48030 LOC_Os06g48020 LOC_Os06g47820 LOC_Os06g47600 LOC_Os06g48000
GO:0007165	biological_process	signal transduction	15	64	405	23155	4e-13	1.1e-11	LOC_Os06g47710 LOC_Os06g47700 LOC_Os06g48200 LOC_Os06g47720 LOC_Os06g47890 LOC_Os06g47590 LOC_Os06g47750 LOC_Os06g47740 LOC_Os06g48160 LOC_Os06g48170 LOC_Os06g47760 LOC_Os06g47550 LOC_Os06g47820 LOC_Os06g47650 LOC_Os06g48180
GO:0043170	biological_process	macromolecule metabolic process	37	64	5122	23155	7.6e-10	1.8e-08	LOC_Os06g47850 LOC_Os06g47870 LOC_Os06g47890 LOC_Os06g47580 LOC_Os06g47340 LOC_Os06g47750 LOC_Os06g48180 LOC_Os06g47710 LOC_Os06g47320 LOC_Os06g47730 LOC_Os06g47470 LOC_Os06g48200 LOC_Os06g47650 LOC_Os06g47530 LOC_Os06g48160 LOC_Os06g47770 LOC_Os06g47620 LOC_Os06g47380 LOC_Os06g47820 LOC_Os06g47840 LOC_Os06g47500 LOC_Os06g47880 LOC_Os06g47590 LOC_Os06g47630 LOC_Os06g48090 LOC_Os06g47700 LOC_Os06g…
GO:0044260	biological_process	cellular macromolecule metabolic process	34	64	4546	23155	2.8e-09	5.9e-08	LOC_Os06g47850 LOC_Os06g47870 LOC_Os06g47890 LOC_Os06g47580 LOC_Os06g47340 LOC_Os06g47750 LOC_Os06g48180 LOC_Os06g47710 LOC_Os06g47320 LOC_Os06g47730 LOC_Os06g47470 LOC_Os06g48200 LOC_Os06g47650 LOC_Os06g47530 LOC_Os06g48160 LOC_Os06g47770 LOC_Os06g47380 LOC_Os06g47820 LOC_Os06g47840 LOC_Os06g47880 LOC_Os06g47590 LOC_Os06g47630 LOC_Os06g48090 LOC_Os06g47700 LOC_Os06g48080 LOC_Os06g47720 LOC_Os06g…
GO:0030154	biological_process	cell differentiation	6	64	62	23155	3.3e-08	5.5e-07	LOC_Os06g47700 LOC_Os06g47720 LOC_Os06g47750 LOC_Os06g47740 LOC_Os06g47650 LOC_Os06g47760
GO:0008152	biological_process	metabolic process	44	64	8041	23155	3.2e-08	5.5e-07	LOC_Os06g47850 LOC_Os06g47870 LOC_Os06g47890 LOC_Os06g47580 LOC_Os06g47340 LOC_Os06g47630 LOC_Os06g47750 LOC_Os06g47550 LOC_Os06g48180 LOC_Os06g47710 LOC_Os06g47320 LOC_Os06g47730 LOC_Os06g47470 LOC_Os06g48200 LOC_Os06g47650 LOC_Os06g47530 LOC_Os06g48160 LOC_Os06g47770 LOC_Os06g47620 LOC_Os06g47380 LOC_Os06g47820 LOC_Os06g48000 LOC_Os06g47840 LOC_Os06g47500 LOC_Os06g47940 LOC_Os06g47880 LOC_Os06g…
GO:0044238	biological_process	primary metabolic process	39	64	6478	23155	4e-08	6.1e-07	LOC_Os06g47850 LOC_Os06g47870 LOC_Os06g47890 LOC_Os06g47580 LOC_Os06g47340 LOC_Os06g47750 LOC_Os06g48180 LOC_Os06g47710 LOC_Os06g47320 LOC_Os06g47730 LOC_Os06g47470 LOC_Os06g48200 LOC_Os06g47650 LOC_Os06g47530 LOC_Os06g48160 LOC_Os06g47770 LOC_Os06g47620 LOC_Os06g47380 LOC_Os06g47820 LOC_Os06g47840 LOC_Os06g47500 LOC_Os06g47880 LOC_Os06g47590 LOC_Os06g47630 LOC_Os06g48090 LOC_Os06g47700 LOC_Os06g…
GO:0009628	biological_process	response to abiotic stimulus	7	64	135	23155	1.3e-07	1.7e-06	LOC_Os06g47320 LOC_Os06g48160 LOC_Os06g48200 LOC_Os06g47590 LOC_Os06g47640 LOC_Os06g48170 LOC_Os06g48180
GO:0044237	biological_process	cellular metabolic process	36	64	5837	23155	1.3e-07	1.7e-06	LOC_Os06g47850 LOC_Os06g47870 LOC_Os06g47890 LOC_Os06g47580 LOC_Os06g47340 LOC_Os06g47750 LOC_Os06g48180 LOC_Os06g47710 LOC_Os06g47320 LOC_Os06g47730 LOC_Os06g47470 LOC_Os06g48200 LOC_Os06g47650 LOC_Os06g47530 LOC_Os06g48160 LOC_Os06g47770 LOC_Os06g47380 LOC_Os06g47820 LOC_Os06g47840 LOC_Os06g47940 LOC_Os06g47880 LOC_Os06g47590 LOC_Os06g47630 LOC_Os06g48090 LOC_Os06g47700 LOC_Os06g48080 LOC_Os06g…
GO:0048869	biological_process	cellular developmental process	6	64	83	23155	1.7e-07	2e-06	LOC_Os06g47700 LOC_Os06g47720 LOC_Os06g47750 LOC_Os06g47740 LOC_Os06g47650 LOC_Os06g47760
GO:0009987	biological_process	cellular process	38	64	7423	23155	6.5e-06	7.2e-05	LOC_Os06g47850 LOC_Os06g47870 LOC_Os06g47890 LOC_Os06g47580 LOC_Os06g47340 LOC_Os06g47750 LOC_Os06g48180 LOC_Os06g47710 LOC_Os06g47320 LOC_Os06g47730 LOC_Os06g47470 LOC_Os06g48200 LOC_Os06g47650 LOC_Os06g47530 LOC_Os06g48160 LOC_Os06g47800 LOC_Os06g47770 LOC_Os06g47620 LOC_Os06g47380 LOC_Os06g47820 LOC_Os06g47840 LOC_Os06g47940 LOC_Os06g47880 LOC_Os06g47590 LOC_Os06g47630 LOC_Os06g48090 LOC_Os06g…
GO:0032502	biological_process	developmental process	7	64	258	23155	8.3e-06	8.6e-05	LOC_Os06g47700 LOC_Os06g47720 LOC_Os06g47590 LOC_Os06g47750 LOC_Os06g47740 LOC_Os06g47650 LOC_Os06g47760
GO:0050794	biological_process	regulation of cellular process	15	64	1699	23155	5e-05	0.00049	LOC_Os06g47710 LOC_Os06g47700 LOC_Os06g48200 LOC_Os06g47720 LOC_Os06g47890 LOC_Os06g47590 LOC_Os06g47750 LOC_Os06g47740 LOC_Os06g48160 LOC_Os06g48170 LOC_Os06g47760 LOC_Os06g47550 LOC_Os06g47820 LOC_Os06g47650 LOC_Os06g48180
GO:0019538	biological_process	protein metabolic process	20	64	2878	23155	6.4e-05	0.00059	LOC_Os06g47880 LOC_Os06g47700 LOC_Os06g48090 LOC_Os06g47320 LOC_Os06g47500 LOC_Os06g47470 LOC_Os06g48070 LOC_Os06g47890 LOC_Os06g47530 LOC_Os06g47740 LOC_Os06g47650 LOC_Os06g47710 LOC_Os06g47340 LOC_Os06g47760 LOC_Os06g47620 LOC_Os06g48110 LOC_Os06g47820 LOC_Os06g47750 LOC_Os06g47720 LOC_Os06g47610
GO:0015074	biological_process	DNA integration	6	64	262	23155	9.6e-05	0.00084	LOC_Os06g48090 LOC_Os06g47730 LOC_Os06g47380 LOC_Os06g47810 LOC_Os06g48110 LOC_Os06g48130
GO:0050789	biological_process	regulation of biological process	15	64	1814	23155	0.0001	0.00087	LOC_Os06g47710 LOC_Os06g47700 LOC_Os06g48200 LOC_Os06g47720 LOC_Os06g47890 LOC_Os06g47590 LOC_Os06g47750 LOC_Os06g47740 LOC_Os06g48160 LOC_Os06g48170 LOC_Os06g47760 LOC_Os06g47550 LOC_Os06g47820 LOC_Os06g47650 LOC_Os06g48180
GO:0006464	biological_process	protein modification process	13	64	1495	23155	0.0002	0.0016	LOC_Os06g47710 LOC_Os06g47700 LOC_Os06g47470 LOC_Os06g47880 LOC_Os06g47750 LOC_Os06g47740 LOC_Os06g47650 LOC_Os06g47340 LOC_Os06g47760 LOC_Os06g47820 LOC_Os06g47530 LOC_Os06g47720 LOC_Os06g47610
GO:0065007	biological_process	biological regulation	15	64	1936	23155	0.00021	0.0016	LOC_Os06g47710 LOC_Os06g47700 LOC_Os06g48200 LOC_Os06g47720 LOC_Os06g47890 LOC_Os06g47590 LOC_Os06g47750 LOC_Os06g47740 LOC_Os06g48160 LOC_Os06g48170 LOC_Os06g47760 LOC_Os06g47550 LOC_Os06g47820 LOC_Os06g47650 LOC_Os06g48180
GO:0006139	biological_process	nucleobase, nucleoside, nucleotide and nucleic acid metabolic process	17	64	2424	23155	0.00024	0.0018	LOC_Os06g47850 LOC_Os06g48080 LOC_Os06g47870 LOC_Os06g48230 LOC_Os06g47730 LOC_Os06g47890 LOC_Os06g47590 LOC_Os06g47580 LOC_Os06g47380 LOC_Os06g47810 LOC_Os06g47770 LOC_Os06g47550 LOC_Os06g48110 LOC_Os06g47630 LOC_Os06g47840 LOC_Os06g48130 LOC_Os06g48090
GO:0006259	biological_process	DNA metabolic process	8	64	599	23155	0.00025	0.0018	LOC_Os06g48090 LOC_Os06g48080 LOC_Os06g47730 LOC_Os06g47580 LOC_Os06g47380 LOC_Os06g47810 LOC_Os06g48110 LOC_Os06g48130
GO:0043412	biological_process	macromolecule modification	13	64	1542	23155	0.00027	0.0018	LOC_Os06g47710 LOC_Os06g47700 LOC_Os06g47470 LOC_Os06g47880 LOC_Os06g47750 LOC_Os06g47740 LOC_Os06g47650 LOC_Os06g47340 LOC_Os06g47760 LOC_Os06g47820 LOC_Os06g47530 LOC_Os06g47720 LOC_Os06g47610
GO:0006468	biological_process	protein amino acid phosphorylation	10	64	1126	23155	0.001	0.0066	LOC_Os06g47700 LOC_Os06g47470 LOC_Os06g47880 LOC_Os06g47750 LOC_Os06g47740 LOC_Os06g47650 LOC_Os06g47820 LOC_Os06g47530 LOC_Os06g47720 LOC_Os06g47610
GO:0006807	biological_process	nitrogen compound metabolic process	17	64	2801	23155	0.0013	0.0079	LOC_Os06g47850 LOC_Os06g48080 LOC_Os06g47870 LOC_Os06g48230 LOC_Os06g47730 LOC_Os06g47890 LOC_Os06g47590 LOC_Os06g47580 LOC_Os06g47380 LOC_Os06g47810 LOC_Os06g47770 LOC_Os06g47550 LOC_Os06g48110 LOC_Os06g47630 LOC_Os06g47840 LOC_Os06g48130 LOC_Os06g48090
GO:0016310	biological_process	phosphorylation	10	64	1217	23155	0.0018	0.011	LOC_Os06g47700 LOC_Os06g47470 LOC_Os06g47880 LOC_Os06g47750 LOC_Os06g47740 LOC_Os06g47650 LOC_Os06g47820 LOC_Os06g47530 LOC_Os06g47720 LOC_Os06g47610
GO:0006796	biological_process	phosphate metabolic process	10	64	1327	23155	0.0034	0.019	LOC_Os06g47700 LOC_Os06g47470 LOC_Os06g47880 LOC_Os06g47750 LOC_Os06g47740 LOC_Os06g47650 LOC_Os06g47820 LOC_Os06g47530 LOC_Os06g47720 LOC_Os06g47610
GO:0006793	biological_process	phosphorus metabolic process	10	64	1327	23155	0.0034	0.019	LOC_Os06g47700 LOC_Os06g47470 LOC_Os06g47880 LOC_Os06g47750 LOC_Os06g47740 LOC_Os06g47650 LOC_Os06g47820 LOC_Os06g47530 LOC_Os06g47720 LOC_Os06g47610
GO:0044267	biological_process	cellular protein metabolic process	14	64	2313	23155	0.0039	0.021	LOC_Os06g47710 LOC_Os06g47700 LOC_Os06g47320 LOC_Os06g47470 LOC_Os06g47880 LOC_Os06g47750 LOC_Os06g47740 LOC_Os06g47650 LOC_Os06g47340 LOC_Os06g47760 LOC_Os06g47820 LOC_Os06g47530 LOC_Os06g47720 LOC_Os06g47610
GO:0043687	biological_process	post-translational protein modification	10	64	1365	23155	0.0042	0.022	LOC_Os06g47700 LOC_Os06g47470 LOC_Os06g47880 LOC_Os06g47750 LOC_Os06g47740 LOC_Os06g47650 LOC_Os06g47820 LOC_Os06g47530 LOC_Os06g47720 LOC_Os06g47610
GO:0009058	biological_process	biosynthetic process	15	64	2873	23155	0.011	0.053	LOC_Os06g47850 LOC_Os06g47870 LOC_Os06g48080 LOC_Os06g48230 LOC_Os06g47550 LOC_Os06g47890 LOC_Os06g47590 LOC_Os06g47940 LOC_Os06g47380 LOC_Os06g47340 LOC_Os06g47770 LOC_Os06g48110 LOC_Os06g47630 LOC_Os06g47840 LOC_Os06g48090
GO:0034645	biological_process	cellular macromolecule biosynthetic process	12	64	2125	23155	0.013	0.062	LOC_Os06g47850 LOC_Os06g47870 LOC_Os06g48080 LOC_Os06g48230 LOC_Os06g47890 LOC_Os06g47590 LOC_Os06g47380 LOC_Os06g47770 LOC_Os06g48110 LOC_Os06g47630 LOC_Os06g47840 LOC_Os06g48090
GO:0009059	biological_process	macromolecule biosynthetic process	12	64	2128	23155	0.013	0.062	LOC_Os06g47850 LOC_Os06g47870 LOC_Os06g48080 LOC_Os06g48230 LOC_Os06g47890 LOC_Os06g47590 LOC_Os06g47380 LOC_Os06g47770 LOC_Os06g48110 LOC_Os06g47630 LOC_Os06g47840 LOC_Os06g48090
GO:0044249	biological_process	cellular biosynthetic process	14	64	2735	23155	0.016	0.074	LOC_Os06g47850 LOC_Os06g47870 LOC_Os06g48080 LOC_Os06g48230 LOC_Os06g47550 LOC_Os06g47890 LOC_Os06g47590 LOC_Os06g47940 LOC_Os06g47380 LOC_Os06g47770 LOC_Os06g48110 LOC_Os06g47630 LOC_Os06g47840 LOC_Os06g48090
GO:0006350	biological_process	transcription	8	64	1336	23155	0.031	0.14	LOC_Os06g47850 LOC_Os06g47870 LOC_Os06g47890 LOC_Os06g47590 LOC_Os06g48230 LOC_Os06g47770 LOC_Os06g47630 LOC_Os06g47840
GO:0006508	biological_process	proteolysis	5	64	695	23155	0.044	0.19	LOC_Os06g48110 LOC_Os06g48070 LOC_Os06g48090 LOC_Os06g47500 LOC_Os06g47620
GO:0010467	biological_process	gene expression	8	64	1995	23155	0.18	0.78	LOC_Os06g47850 LOC_Os06g47870 LOC_Os06g47890 LOC_Os06g47590 LOC_Os06g48230 LOC_Os06g47770 LOC_Os06g47630 LOC_Os06g47840
GO:0016740	molecular_function	transferase activity	28	64	2880	23155	5.6e-10	9.5e-08	LOC_Os06g47950 LOC_Os06g47890 LOC_Os06g47580 LOC_Os06g47340 LOC_Os06g47750 LOC_Os06g48180 LOC_Os06g47570 LOC_Os06g48080 LOC_Os06g47470 LOC_Os06g48200 LOC_Os06g47650 LOC_Os06g47530 LOC_Os06g48160 LOC_Os06g47380 LOC_Os06g47820 LOC_Os06g47600 LOC_Os06g47880 LOC_Os06g47710 LOC_Os06g47700 LOC_Os06g48090 LOC_Os06g47720 LOC_Os06g47740 LOC_Os06g48230 LOC_Os06g48170 LOC_Os06g47760 LOC_Os06g48030 LOC_Os06g…
GO:0003824	molecular_function	catalytic activity	44	64	7902	23155	1.8e-08	1.5e-06	LOC_Os06g48210 LOC_Os06g47950 LOC_Os06g48060 LOC_Os06g47890 LOC_Os06g47580 LOC_Os06g47340 LOC_Os06g47750 LOC_Os06g47550 LOC_Os06g48180 LOC_Os06g47570 LOC_Os06g48080 LOC_Os06g48065 LOC_Os06g47470 LOC_Os06g48140 LOC_Os06g48200 LOC_Os06g47650 LOC_Os06g47530 LOC_Os06g48160 LOC_Os06g48220 LOC_Os06g48100 LOC_Os06g47380 LOC_Os06g47820 LOC_Os06g47600 LOC_Os06g48000 LOC_Os06g47960 LOC_Os06g47880 LOC_Os06g…
GO:0004713	molecular_function	protein tyrosine kinase activity	9	64	261	23155	5.4e-08	3.1e-06	LOC_Os06g47700 LOC_Os06g47470 LOC_Os06g47880 LOC_Os06g47750 LOC_Os06g47740 LOC_Os06g47650 LOC_Os06g47820 LOC_Os06g47530 LOC_Os06g47720
GO:0016772	molecular_function	transferase activity, transferring phosphorus-containing groups	19	64	1708	23155	1.1e-07	4.8e-06	LOC_Os06g47710 LOC_Os06g47700 LOC_Os06g48090 LOC_Os06g48080 LOC_Os06g47470 LOC_Os06g47880 LOC_Os06g47890 LOC_Os06g47580 LOC_Os06g47530 LOC_Os06g47740 LOC_Os06g47380 LOC_Os06g47650 LOC_Os06g47720 LOC_Os06g47760 LOC_Os06g48110 LOC_Os06g47820 LOC_Os06g47750 LOC_Os06g47600 LOC_Os06g47610
GO:0005488	molecular_function	binding	45	64	9475	23155	2e-06	4.5e-05	LOC_Os06g47850 LOC_Os06g47870 LOC_Os06g47580 LOC_Os06g47630 LOC_Os06g47750 LOC_Os06g47550 LOC_Os06g47710 LOC_Os06g47320 LOC_Os06g47730 LOC_Os06g47470 LOC_Os06g48060 LOC_Os06g47530 LOC_Os06g47640 LOC_Os06g48040 LOC_Os06g47800 LOC_Os06g47770 LOC_Os06g47620 LOC_Os06g47380 LOC_Os06g47820 LOC_Os06g47900 LOC_Os06g48000 LOC_Os06g47840 LOC_Os06g47960 LOC_Os06g47860 LOC_Os06g47940 LOC_Os06g47880 LOC_Os06g…
GO:0004871	molecular_function	signal transducer activity	9	64	396	23155	1.6e-06	4.5e-05	LOC_Os06g47710 LOC_Os06g47700 LOC_Os06g47720 LOC_Os06g47890 LOC_Os06g47750 LOC_Os06g47740 LOC_Os06g47650 LOC_Os06g47760 LOC_Os06g47600
GO:0004872	molecular_function	receptor activity	8	64	301	23155	2.1e-06	4.5e-05	LOC_Os06g47710 LOC_Os06g47700 LOC_Os06g47720 LOC_Os06g47750 LOC_Os06g47740 LOC_Os06g47650 LOC_Os06g47760 LOC_Os06g47600
GO:0060089	molecular_function	molecular transducer activity	9	64	396	23155	1.6e-06	4.5e-05	LOC_Os06g47710 LOC_Os06g47700 LOC_Os06g47720 LOC_Os06g47890 LOC_Os06g47750 LOC_Os06g47740 LOC_Os06g47650 LOC_Os06g47760 LOC_Os06g47600
GO:0016787	molecular_function	hydrolase activity	22	64	2776	23155	2.8e-06	5.4e-05	LOC_Os06g48070 LOC_Os06g48060 LOC_Os06g47890 LOC_Os06g48180 LOC_Os06g48080 LOC_Os06g47550 LOC_Os06g48200 LOC_Os06g48160 LOC_Os06g47620 LOC_Os06g48020 LOC_Os06g48000 LOC_Os06g47960 LOC_Os06g47380 LOC_Os06g47330 LOC_Os06g48090 LOC_Os06g48210 LOC_Os06g48170 LOC_Os06g47500 LOC_Os06g48030 LOC_Os06g48110 LOC_Os06g47910 LOC_Os06g48010
GO:0016301	molecular_function	kinase activity	14	64	1383	23155	2.1e-05	0.00037	LOC_Os06g47710 LOC_Os06g47700 LOC_Os06g47470 LOC_Os06g47880 LOC_Os06g47890 LOC_Os06g47750 LOC_Os06g47740 LOC_Os06g47650 LOC_Os06g47720 LOC_Os06g47760 LOC_Os06g47820 LOC_Os06g47530 LOC_Os06g47600 LOC_Os06g47610
GO:0034061	molecular_function	DNA polymerase activity	5	64	170	23155	0.00012	0.0019	LOC_Os06g48110 LOC_Os06g47380 LOC_Os06g48080 LOC_Os06g47580 LOC_Os06g48090
GO:0005515	molecular_function	protein binding	15	64	1982	23155	0.00028	0.0039	LOC_Os06g47710 LOC_Os06g47700 LOC_Os06g47870 LOC_Os06g47320 LOC_Os06g48065 LOC_Os06g47720 LOC_Os06g47650 LOC_Os06g47750 LOC_Os06g47740 LOC_Os06g48040 LOC_Os06g47800 LOC_Os06g47760 LOC_Os06g47620 LOC_Os06g47630 LOC_Os06g47820
GO:0000166	molecular_function	nucleotide binding	18	64	2928	23155	0.00076	0.01	LOC_Os06g47710 LOC_Os06g47700 LOC_Os06g47330 LOC_Os06g47320 LOC_Os06g47550 LOC_Os06g47470 LOC_Os06g47880 LOC_Os06g48060 LOC_Os06g47750 LOC_Os06g47740 LOC_Os06g47650 LOC_Os06g47800 LOC_Os06g47760 LOC_Os06g48210 LOC_Os06g47820 LOC_Os06g47530 LOC_Os06g47720 LOC_Os06g47610
GO:0032555	molecular_function	purine ribonucleotide binding	16	64	2461	23155	0.00089	0.01	LOC_Os06g48210 LOC_Os06g47700 LOC_Os06g47330 LOC_Os06g47320 LOC_Os06g47550 LOC_Os06g47470 LOC_Os06g47880 LOC_Os06g48060 LOC_Os06g47750 LOC_Os06g47740 LOC_Os06g47650 LOC_Os06g47800 LOC_Os06g47820 LOC_Os06g47530 LOC_Os06g47720 LOC_Os06g47610
GO:0032553	molecular_function	ribonucleotide binding	16	64	2461	23155	0.00089	0.01	LOC_Os06g48210 LOC_Os06g47700 LOC_Os06g47330 LOC_Os06g47320 LOC_Os06g47550 LOC_Os06g47470 LOC_Os06g47880 LOC_Os06g48060 LOC_Os06g47750 LOC_Os06g47740 LOC_Os06g47650 LOC_Os06g47800 LOC_Os06g47820 LOC_Os06g47530 LOC_Os06g47720 LOC_Os06g47610
GO:0004674	molecular_function	protein serine/threonine kinase activity	9	64	944	23155	0.0012	0.011	LOC_Os06g47700 LOC_Os06g47470 LOC_Os06g47880 LOC_Os06g47750 LOC_Os06g47740 LOC_Os06g47650 LOC_Os06g47820 LOC_Os06g47530 LOC_Os06g47720
GO:0004672	molecular_function	protein kinase activity	10	64	1130	23155	0.0011	0.011	LOC_Os06g47700 LOC_Os06g47470 LOC_Os06g47880 LOC_Os06g47750 LOC_Os06g47740 LOC_Os06g47650 LOC_Os06g47820 LOC_Os06g47530 LOC_Os06g47720 LOC_Os06g47610
GO:0005524	molecular_function	ATP binding	15	64	2290	23155	0.0012	0.011	LOC_Os06g48210 LOC_Os06g47700 LOC_Os06g47320 LOC_Os06g47550 LOC_Os06g47470 LOC_Os06g47880 LOC_Os06g48060 LOC_Os06g47750 LOC_Os06g47740 LOC_Os06g47650 LOC_Os06g47800 LOC_Os06g47820 LOC_Os06g47530 LOC_Os06g47720 LOC_Os06g47610
GO:0032559	molecular_function	adenyl ribonucleotide binding	15	64	2291	23155	0.0012	0.011	LOC_Os06g48210 LOC_Os06g47700 LOC_Os06g47320 LOC_Os06g47550 LOC_Os06g47470 LOC_Os06g47880 LOC_Os06g48060 LOC_Os06g47750 LOC_Os06g47740 LOC_Os06g47650 LOC_Os06g47800 LOC_Os06g47820 LOC_Os06g47530 LOC_Os06g47720 LOC_Os06g47610
GO:0003677	molecular_function	DNA binding	13	64	1859	23155	0.0016	0.012	LOC_Os06g47850 LOC_Os06g48090 LOC_Os06g47870 LOC_Os06g47730 LOC_Os06g47590 LOC_Os06g47580 LOC_Os06g47380 LOC_Os06g47810 LOC_Os06g47770 LOC_Os06g48110 LOC_Os06g47630 LOC_Os06g48130 LOC_Os06g47840
GO:0017076	molecular_function	purine nucleotide binding	16	64	2588	23155	0.0015	0.012	LOC_Os06g48210 LOC_Os06g47700 LOC_Os06g47330 LOC_Os06g47320 LOC_Os06g47550 LOC_Os06g47470 LOC_Os06g47880 LOC_Os06g48060 LOC_Os06g47750 LOC_Os06g47740 LOC_Os06g47650 LOC_Os06g47800 LOC_Os06g47820 LOC_Os06g47530 LOC_Os06g47720 LOC_Os06g47610
GO:0016779	molecular_function	nucleotidyltransferase activity	5	64	296	23155	0.0014	0.012	LOC_Os06g48110 LOC_Os06g47380 LOC_Os06g48080 LOC_Os06g47580 LOC_Os06g48090
GO:0003676	molecular_function	nucleic acid binding	17	64	2881	23155	0.0017	0.013	LOC_Os06g47850 LOC_Os06g47960 LOC_Os06g47870 LOC_Os06g48080 LOC_Os06g47730 LOC_Os06g48210 LOC_Os06g47590 LOC_Os06g47580 LOC_Os06g47380 LOC_Os06g47810 LOC_Os06g47770 LOC_Os06g48110 LOC_Os06g47630 LOC_Os06g47830 LOC_Os06g47840 LOC_Os06g48130 LOC_Os06g48090
GO:0001883	molecular_function	purine nucleoside binding	15	64	2414	23155	0.0021	0.014	LOC_Os06g48210 LOC_Os06g47700 LOC_Os06g47320 LOC_Os06g47550 LOC_Os06g47470 LOC_Os06g47880 LOC_Os06g48060 LOC_Os06g47750 LOC_Os06g47740 LOC_Os06g47650 LOC_Os06g47800 LOC_Os06g47820 LOC_Os06g47530 LOC_Os06g47720 LOC_Os06g47610
GO:0001882	molecular_function	nucleoside binding	15	64	2423	23155	0.0022	0.014	LOC_Os06g48210 LOC_Os06g47700 LOC_Os06g47320 LOC_Os06g47550 LOC_Os06g47470 LOC_Os06g47880 LOC_Os06g48060 LOC_Os06g47750 LOC_Os06g47740 LOC_Os06g47650 LOC_Os06g47800 LOC_Os06g47820 LOC_Os06g47530 LOC_Os06g47720 LOC_Os06g47610
GO:0030554	molecular_function	adenyl nucleotide binding	15	64	2414	23155	0.0021	0.014	LOC_Os06g48210 LOC_Os06g47700 LOC_Os06g47320 LOC_Os06g47550 LOC_Os06g47470 LOC_Os06g47880 LOC_Os06g48060 LOC_Os06g47750 LOC_Os06g47740 LOC_Os06g47650 LOC_Os06g47800 LOC_Os06g47820 LOC_Os06g47530 LOC_Os06g47720 LOC_Os06g47610
GO:0016773	molecular_function	phosphotransferase activity, alcohol group as acceptor	10	64	1257	23155	0.0023	0.015	LOC_Os06g47700 LOC_Os06g47470 LOC_Os06g47880 LOC_Os06g47750 LOC_Os06g47740 LOC_Os06g47650 LOC_Os06g47820 LOC_Os06g47530 LOC_Os06g47720 LOC_Os06g47610
GO:0016758	molecular_function	transferase activity, transferring hexosyl groups	5	64	348	23155	0.0029	0.018	LOC_Os06g47340 LOC_Os06g48170 LOC_Os06g48200 LOC_Os06g48160 LOC_Os06g48180
GO:0030528	molecular_function	transcription regulator activity	7	64	759	23155	0.005	0.03	LOC_Os06g47850 LOC_Os06g47870 LOC_Os06g47590 LOC_Os06g47350 LOC_Os06g47770 LOC_Os06g47630 LOC_Os06g47840
GO:0046872	molecular_function	metal ion binding	15	64	2709	23155	0.0063	0.036	LOC_Os06g47860 LOC_Os06g47940 LOC_Os06g48065 LOC_Os06g48020 LOC_Os06g47580 LOC_Os06g48010 LOC_Os06g47640 LOC_Os06g48040 LOC_Os06g47810 LOC_Os06g48030 LOC_Os06g48110 LOC_Os06g47840 LOC_Os06g47550 LOC_Os06g48000 LOC_Os06g47330
GO:0016757	molecular_function	transferase activity, transferring glycosyl groups	5	64	468	23155	0.0098	0.054	LOC_Os06g47340 LOC_Os06g48170 LOC_Os06g48200 LOC_Os06g48160 LOC_Os06g48180
GO:0043169	molecular_function	cation binding	15	64	2899	23155	0.011	0.06	LOC_Os06g47860 LOC_Os06g47940 LOC_Os06g48065 LOC_Os06g48020 LOC_Os06g47580 LOC_Os06g48010 LOC_Os06g47640 LOC_Os06g48040 LOC_Os06g47810 LOC_Os06g48030 LOC_Os06g48110 LOC_Os06g47840 LOC_Os06g47550 LOC_Os06g48000 LOC_Os06g47330
GO:0043167	molecular_function	ion binding	15	64	2900	23155	0.012	0.06	LOC_Os06g47860 LOC_Os06g47940 LOC_Os06g48065 LOC_Os06g48020 LOC_Os06g47580 LOC_Os06g48010 LOC_Os06g47640 LOC_Os06g48040 LOC_Os06g47810 LOC_Os06g48030 LOC_Os06g48110 LOC_Os06g47840 LOC_Os06g47550 LOC_Os06g48000 LOC_Os06g47330
GO:0005506	molecular_function	iron ion binding	5	64	616	23155	0.028	0.14	LOC_Os06g48020 LOC_Os06g48010 LOC_Os06g47940 LOC_Os06g48000 LOC_Os06g48030
GO:0046914	molecular_function	transition metal ion binding	11	64	2220	23155	0.04	0.2	LOC_Os06g47860 LOC_Os06g47940 LOC_Os06g48065 LOC_Os06g48020 LOC_Os06g48040 LOC_Os06g47810 LOC_Os06g48030 LOC_Os06g48110 LOC_Os06g48010 LOC_Os06g48000 LOC_Os06g47840
GO:0016788	molecular_function	hydrolase activity, acting on ester bonds	5	64	693	23155	0.043	0.2	LOC_Os06g47380 LOC_Os06g47960 LOC_Os06g48090 LOC_Os06g48080 LOC_Os06g47910
GO:0070011	molecular_function	peptidase activity, acting on L-amino acid peptides	5	64	690	23155	0.043	0.2	LOC_Os06g48110 LOC_Os06g48070 LOC_Os06g48090 LOC_Os06g47500 LOC_Os06g47620
GO:0008233	molecular_function	peptidase activity	5	64	762	23155	0.06	0.27	LOC_Os06g48110 LOC_Os06g48070 LOC_Os06g48090 LOC_Os06g47500 LOC_Os06g47620
GO:0008270	molecular_function	zinc ion binding	6	64	1378	23155	0.18	0.79	LOC_Os06g47860 LOC_Os06g48065 LOC_Os06g48040 LOC_Os06g47810 LOC_Os06g48110 LOC_Os06g47840
GO:0016491	molecular_function	oxidoreductase activity	5	64	1387	23155	0.34	1	LOC_Os06g48020 LOC_Os06g48030 LOC_Os06g48010 LOC_Os06g48000 LOC_Os06g48100
GO:0030312	cellular_component	external encapsulating structure	11	64	105	23155	1.8e-14	5.2e-13	LOC_Os06g48210 LOC_Os06g48200 LOC_Os06g48010 LOC_Os06g48160 LOC_Os06g48170 LOC_Os06g48030 LOC_Os06g48020 LOC_Os06g47910 LOC_Os06g47600 LOC_Os06g48000 LOC_Os06g48180
GO:0005618	cellular_component	cell wall	11	64	99	23155	9.7e-15	5.2e-13	LOC_Os06g48210 LOC_Os06g48200 LOC_Os06g48010 LOC_Os06g48160 LOC_Os06g48170 LOC_Os06g48030 LOC_Os06g48020 LOC_Os06g47910 LOC_Os06g47600 LOC_Os06g48000 LOC_Os06g48180
GO:0005886	cellular_component	plasma membrane	9	64	293	23155	1.4e-07	2.7e-06	LOC_Os06g47700 LOC_Os06g47470 LOC_Os06g47750 LOC_Os06g47740 LOC_Os06g47650 LOC_Os06g47800 LOC_Os06g47760 LOC_Os06g47530 LOC_Os06g47720
GO:0005576	cellular_component	extracellular region	5	64	261	23155	0.00083	0.012	LOC_Os06g48160 LOC_Os06g48170 LOC_Os06g47800 LOC_Os06g48200 LOC_Os06g48180
GO:0005634	cellular_component	nucleus	10	64	1653	23155	0.015	0.18	LOC_Os06g47870 LOC_Os06g48210 LOC_Os06g47890 LOC_Os06g47590 LOC_Os06g48020 LOC_Os06g48030 LOC_Os06g48110 LOC_Os06g47630 LOC_Os06g48010 LOC_Os06g48000
GO:0016020	cellular_component	membrane	15	64	3523	23155	0.055	0.53	LOC_Os06g47700 LOC_Os06g47550 LOC_Os06g47470 LOC_Os06g48060 LOC_Os06g47590 LOC_Os06g47750 LOC_Os06g47740 LOC_Os06g47650 LOC_Os06g47800 LOC_Os06g47340 LOC_Os06g47720 LOC_Os06g47760 LOC_Os06g47820 LOC_Os06g47530 LOC_Os06g47600
GO:0043231	cellular_component	intracellular membrane-bounded organelle	24	64	15273	23155	1	1	LOC_Os06g47870 LOC_Os06g47890 LOC_Os06g47750 LOC_Os06g47320 LOC_Os06g47550 LOC_Os06g47470 LOC_Os06g48060 LOC_Os06g47530 LOC_Os06g47800 LOC_Os06g47920 LOC_Os06g47620 LOC_Os06g48020 LOC_Os06g48000 LOC_Os06g47590 LOC_Os06g47630 LOC_Os06g47700 LOC_Os06g47720 LOC_Os06g48210 LOC_Os06g47740 LOC_Os06g47650 LOC_Os06g47760 LOC_Os06g48030 LOC_Os06g48110 LOC_Os06g48010
GO:0044424	cellular_component	intracellular part	28	64	16030	23155	1	1	LOC_Os06g47870 LOC_Os06g48060 LOC_Os06g47890 LOC_Os06g47750 LOC_Os06g48180 LOC_Os06g47320 LOC_Os06g47550 LOC_Os06g47470 LOC_Os06g48200 LOC_Os06g47650 LOC_Os06g47530 LOC_Os06g48160 LOC_Os06g47800 LOC_Os06g47920 LOC_Os06g47620 LOC_Os06g48020 LOC_Os06g48000 LOC_Os06g47590 LOC_Os06g47630 LOC_Os06g47700 LOC_Os06g47720 LOC_Os06g48210 LOC_Os06g47740 LOC_Os06g48170 LOC_Os06g47760 LOC_Os06g48030 LOC_Os06g…
GO:0043229	cellular_component	intracellular organelle	24	64	15631	23155	1	1	LOC_Os06g47870 LOC_Os06g47890 LOC_Os06g47750 LOC_Os06g47320 LOC_Os06g47550 LOC_Os06g47470 LOC_Os06g48060 LOC_Os06g47530 LOC_Os06g47800 LOC_Os06g47920 LOC_Os06g47620 LOC_Os06g48020 LOC_Os06g48000 LOC_Os06g47590 LOC_Os06g47630 LOC_Os06g47700 LOC_Os06g47720 LOC_Os06g48210 LOC_Os06g47740 LOC_Os06g47650 LOC_Os06g47760 LOC_Os06g48030 LOC_Os06g48110 LOC_Os06g48010
GO:0005622	cellular_component	intracellular	31	64	16347	23155	1	1	LOC_Os06g47870 LOC_Os06g48060 LOC_Os06g47890 LOC_Os06g47580 LOC_Os06g47750 LOC_Os06g48180 LOC_Os06g47320 LOC_Os06g47550 LOC_Os06g47470 LOC_Os06g48200 LOC_Os06g47650 LOC_Os06g47530 LOC_Os06g48160 LOC_Os06g47800 LOC_Os06g47920 LOC_Os06g47620 LOC_Os06g48020 LOC_Os06g48000 LOC_Os06g47840 LOC_Os06g47860 LOC_Os06g47590 LOC_Os06g47630 LOC_Os06g47700 LOC_Os06g47720 LOC_Os06g48210 LOC_Os06g47740 LOC_Os06g…
GO:0043227	cellular_component	membrane-bounded organelle	24	64	15274	23155	1	1	LOC_Os06g47870 LOC_Os06g47890 LOC_Os06g47750 LOC_Os06g47320 LOC_Os06g47550 LOC_Os06g47470 LOC_Os06g48060 LOC_Os06g47530 LOC_Os06g47800 LOC_Os06g47920 LOC_Os06g47620 LOC_Os06g48020 LOC_Os06g48000 LOC_Os06g47590 LOC_Os06g47630 LOC_Os06g47700 LOC_Os06g47720 LOC_Os06g48210 LOC_Os06g47740 LOC_Os06g47650 LOC_Os06g47760 LOC_Os06g48030 LOC_Os06g48110 LOC_Os06g48010
GO:0044444	cellular_component	cytoplasmic part	14	64	14318	23155	1	1	LOC_Os06g47700 LOC_Os06g47320 LOC_Os06g47550 LOC_Os06g47470 LOC_Os06g48060 LOC_Os06g47750 LOC_Os06g47740 LOC_Os06g47650 LOC_Os06g47800 LOC_Os06g47920 LOC_Os06g47760 LOC_Os06g47620 LOC_Os06g47530 LOC_Os06g47720
GO:0005739	cellular_component	mitochondrion	12	64	4190	23155	0.5	1	LOC_Os06g47700 LOC_Os06g47320 LOC_Os06g47470 LOC_Os06g48060 LOC_Os06g47750 LOC_Os06g47740 LOC_Os06g47650 LOC_Os06g47800 LOC_Os06g47920 LOC_Os06g47760 LOC_Os06g47530 LOC_Os06g47720
GO:0044464	cellular_component	cell part	35	64	18466	23155	1	1	LOC_Os06g47870 LOC_Os06g48060 LOC_Os06g47890 LOC_Os06g47580 LOC_Os06g47340 LOC_Os06g47750 LOC_Os06g48180 LOC_Os06g47320 LOC_Os06g47550 LOC_Os06g47470 LOC_Os06g48200 LOC_Os06g47650 LOC_Os06g47530 LOC_Os06g48160 LOC_Os06g47800 LOC_Os06g47920 LOC_Os06g47620 LOC_Os06g48020 LOC_Os06g47820 LOC_Os06g47600 LOC_Os06g48000 LOC_Os06g47840 LOC_Os06g47860 LOC_Os06g47590 LOC_Os06g47630 LOC_Os06g47700 LOC_Os06g…
GO:0005623	cellular_component	cell	35	64	18467	23155	1	1	LOC_Os06g47870 LOC_Os06g48060 LOC_Os06g47890 LOC_Os06g47580 LOC_Os06g47340 LOC_Os06g47750 LOC_Os06g48180 LOC_Os06g47320 LOC_Os06g47550 LOC_Os06g47470 LOC_Os06g48200 LOC_Os06g47650 LOC_Os06g47530 LOC_Os06g48160 LOC_Os06g47800 LOC_Os06g47920 LOC_Os06g47620 LOC_Os06g48020 LOC_Os06g47820 LOC_Os06g47600 LOC_Os06g48000 LOC_Os06g47840 LOC_Os06g47860 LOC_Os06g47590 LOC_Os06g47630 LOC_Os06g47700 LOC_Os06g…
GO:0043226	cellular_component	organelle	24	64	15631	23155	1	1	LOC_Os06g47870 LOC_Os06g47890 LOC_Os06g47750 LOC_Os06g47320 LOC_Os06g47550 LOC_Os06g47470 LOC_Os06g48060 LOC_Os06g47530 LOC_Os06g47800 LOC_Os06g47920 LOC_Os06g47620 LOC_Os06g48020 LOC_Os06g48000 LOC_Os06g47590 LOC_Os06g47630 LOC_Os06g47700 LOC_Os06g47720 LOC_Os06g48210 LOC_Os06g47740 LOC_Os06g47650 LOC_Os06g47760 LOC_Os06g48030 LOC_Os06g48110 LOC_Os06g48010
GO:0005737	cellular_component	cytoplasm	23	64	14583	23155	1	1	LOC_Os06g48200 LOC_Os06g47750 LOC_Os06g48180 LOC_Os06g47320 LOC_Os06g47550 LOC_Os06g47470 LOC_Os06g48060 LOC_Os06g48170 LOC_Os06g47530 LOC_Os06g48160 LOC_Os06g47800 LOC_Os06g47920 LOC_Os06g47620 LOC_Os06g48020 LOC_Os06g48000 LOC_Os06g47700 LOC_Os06g47720 LOC_Os06g48210 LOC_Os06g47740 LOC_Os06g47650 LOC_Os06g47760 LOC_Os06g48030 LOC_Os06g48010
