# Supplementary material for: Mining Beneficial Genes for Salt Tolerance From a Core Collection of Rice Landraces at the Seedling Stage Through Genome-Wide Association Mapping
Source: Front Plant Sci. 2022 Apr 26;13:847863. doi: 10.3389/fpls.2022.847863 (PMC9087808; doi:10.3389/fpls.2022.847863)
Supplement: Supplementary file 6 [file Table_6.XLSX]

## Sheet: Table S7
Table S7. Candidate Genes
Chr	From	To	Locus Name	Description
6	28847257	28848022	LOC_Os06g47640	OsCML29 - Calmodulin-related calcium sensor protein, expressed
6	28874838	28878068	LOC_Os06g47720	serine/threonine-protein kinase BRI1-like 2 precursor, putative, expressed
6	28905577	28909089	LOC_Os06g47760	phytosulfokine receptor precursor, putative, expressed
6	28926195	28930077	LOC_Os06g47800	disease resistance protein RGA3, putative, expressed
6	28941271	28943704	LOC_Os06g47820	protein kinase domain containing protein, expressed
6	28954541	28957840	LOC_Os06g47840	ZOS6-08 - C2H2 zinc finger protein, expressed
6	28958626	28960418	LOC_Os06g47850	zinc finger family protein, putative, expressed
6	28967974	28969110	LOC_Os06g47880	cell division control protein 2 homolog 3, putative, expressed
6	28995477	28997357	LOC_Os06g47950	tetratricopeptide-like helical, putative, expressed
6	28998828	28999481	LOC_Os06g47960	nucleic acid binding protein, putative, expressed
6	29002132	29003608	LOC_Os06g47970	Protein of unknown function DUF1517 domain containing protein
