# Supplementary material for: Mining Beneficial Genes for Salt Tolerance From a Core Collection of Rice Landraces at the Seedling Stage Through Genome-Wide Association Mapping
Source: Front Plant Sci. 2022 Apr 26;13:847863. doi: 10.3389/fpls.2022.847863 (PMC9087808; doi:10.3389/fpls.2022.847863)
Supplement: Supplementary file 8 [file Table_8.XLSX]

## Sheet: Sheet1
Table 10. Primers used for the real time PCR.
actin-F	ACCATTGGTGCTGAGCGTTT
actin-R	CGCAGCTTCCATTCCTATGAA
LOC_Os06g47720-F	AAGGTCCTGATCGCCATCGTT
LOC_Os06g47720-R	CTCTCCCGCCATCATGAACCG
LOC_Os06g47820-F	AGGCATCCAACGTGCTTCTCACC
LOC_Os06g47820-R	AACGCGAACACGTCCGTCT
LOC_Os06g47850-F	TCAGGGCTCTTCGTTCTTGT
LOC_Os06g47850-R	CGGAGAGATTTCAGCCTTGC
LOC_Os06g47970-F	CATCTACATCAACCCACCGG
LOC_Os06g47970-R	GTTGAGAAACCGCCTGACAG
