# Supplementary material for: Mining Beneficial Genes for Salt Tolerance From a Core Collection of Rice Landraces at the Seedling Stage Through Genome-Wide Association Mapping
Source: Front Plant Sci. 2022 Apr 26;13:847863. doi: 10.3389/fpls.2022.847863 (PMC9087808; doi:10.3389/fpls.2022.847863)
Supplement: Supplementary file 9 [file Table_9.XLSX]

## Sheet: Table S9
Table S9. Rice varieties used in this study.
#	BMK_ID	Subspecies	Variety Name	Origin
S1	BMK130724-562_aa	Inlace	Early pradifice	Unknown
S2	BMK130724-562_ab	Inlace	Poetih	Celebes
S3	BMK130724-562_ac	Inlace	Tebaro	Taiwan
S4	BMK130724-562_ad	Inlace	Mandi	Yangtze River region
S5	BMK130724-562_ae	Inlace	Bu gou wei	South China
S6	BMK130724-562_af	Inlace	Bai gu	South China
S7	BMK130724-562_ag	Inlace	Zao sheng da ye	Japan
S8	BMK130724-562_ah	Inlace	Yin guang	Japan
S9	BMK130724-562_ai	Jalace	Ai you	Japan
S10	BMK130724-562_aj	Jalace	Xiang chuan	Central China
S11	BMK130724-562_ak	Jalace	Kun shan zhu zhou dao	Japan
S12	BMK130724-562_al	Jalace	Mang shui dao	South China
S13	BMK130724-562_am	Inlace	Bai mang gao li han dao bai	North China
S14	BMK130724-562_an	Inlace	Shen shui wan dao	Yangtze River region
S15	BMK130724-562_ao	Inlace	Ba xian shu	Japan
S16	BMK130724-562_ap	Inlace	Duan mang zi jin gu	Northeast China
S17	BMK130724-562_aq	Jalace	Zi jin gu	Northeast China
S18	BMK130724-562_ar	Inlace	Ao hua da gui tou hong	Yangtze River region
S19	BMK130724-562_as	Inlace	Guang hong mi dao	Yangtze River region
S20	BMK130724-562_at	Inlace	Wu mang yan guo qing	South China
S21	BMK130724-562_au	Jalace	Ai da tou	Yangtze River region
S22	BMK130724-562_av	Inlace	Gui zao bai he	Yangtze River region
S23	BMK130724-562_aw	Inlace	Ⅲ-49-4xi chuan huang	Taiwan
S24	BMK130724-562_ax	Inlace	Xi chuan huang liu	North China
S25	BMK130724-562_ay	Inlace	Jian tou nuo	Yunnan-Kweichow Plateau
S26	BMK130724-562_az	Inlace	Xiang dao	Japan
S27	BMK130724-562_ba	Inlace	Jiang wan 15	Central China
S28	BMK130724-562_bb	Inlace	Bai ke da nuo	South China
S29	BMK130724-562_bc	Inlace	Da gu zao	South China
S30	BMK130724-562_bd	Inlace	Jie yang dong liao zhong	Central China
S31	BMK130724-562_be	Inlace	Zeng cheng xiang shan zhan	South China
S32	BMK130724-562_bf	Inlace	shui zao huang pi	South China
S33	BMK130724-562_bg	Inlace	chi mao zhan	South China
S34	BMK130724-562_bh	Inlace	nan xiong ku gua zao	South China
S35	BMK130724-562_bi	Inlace	Gen yin 29	South China
S36	BMK130724-562_bj	Inlace	Yang zhan 3	South China
S37	BMK130724-562_bk	Inlace	Bai ke	South China
S38	BMK130724-562_bl	Inlace	Luo ding zhan 1	South China
S39	BMK130724-562_bm	Inlace	cang wu shan he zhan	South China
S40	BMK130724-562_bn	Inlace	hua bai ke	Central China
S41	BMK130724-562_bo	Inlace	chang mang	South China
S42	BMK130724-562_bp	Inlace	ben cheng guan yin zhan	Central China
S43	BMK130724-562_bq	Inlace	guang ye hong mi	South China
S44	BMK130724-562_br	Inlace	hong zao gu	South China
S45	BMK130724-562_bs	Inlace	Chuan chi 1	Central China
S46	BMK130724-562_bt	Inlace	hu bei zao	South China
S47	BMK130724-562_bu	Inlace	you zhan hong	South China
S48	BMK130724-562_bv	Inlace	shui tian zhan gu nuo	South China
S49	BMK130724-562_bw	Inlace	chang hang da hua ke	South China
S50	BMK130724-562_bx	Inlace	da he	South China
S51	BMK130724-562_by	Inlace	zeng cheng hei nuo	South China
S52	BMK130724-562_bz	Inlace	mao he	Celebes
S53	BMK130724-562_ca	Inlace	hei nuo	Yangtze River region
S54	BMK130724-562_cb	Inlace	bai gu zhan	Central China
S55	BMK130724-562_cc	Inlace	die zhi	South China
S56	BMK130724-562_cd	Inlace	you zhan	South China
S57	BMK130724-562_ce	Inlace	xu zi	Yangtze River region
S58	BMK130724-562_cf	Inlace	cang wu shan he zhan	South China
S59	BMK130724-562_cg	Inlace	chang sha wu qu wan dao	Central China
S60	BMK130724-562_ch	Inlace	chang ning wu qu nan tou zhan	Central China
S61	BMK130724-562_ci	Inlace	Ba shi zi	Yangtze River region
S62	BMK130724-562_cj	Inlace	tong ling hu nan xian	Central China
S63	BMK130724-562_ck	Inlace	xiao mao dao	Japan
S64	BMK130724-562_cl	Inlace	jing xian si qu er gan	South China
S65	BMK130724-562_cm	Inlace	zi xing er qu si du xu dao	Central China
S66	BMK130724-562_cn	Inlace	dong an hou zi pu xiang he zhan	Central China
S67	BMK130724-562_co	Inlace	xian zi zhan	Central China
S68	BMK130724-562_cp	Inlace	chi bai gan zhan	Central China
S69	BMK130724-562_cq	Inlace	chen hui fu dao	Central China
S70	BMK130724-562_cr	Inlace	bai gan zi	Central China
S71	BMK130724-562_cs	Inlace	zao lu wei zhan	Central China
S72	BMK130724-562_ct	Inlace	da yi mao	Central China
S73	BMK130724-562_cu	Inlace	gai cao zhan	Central China
S74	BMK130724-562_cv	Inlace	zao die zhan gu	Central China
S75	BMK130724-562_cw	Inlace	pi xian da ye zi	Central China
S76	BMK130724-562_cx	Inlace	xin hua san qu tang mao zhan	Central China
S78	BMK130724-562_cz	Inlace	mian tiao zhan	Central China
S79	BMK130724-562_da	Inlace	hu guang zhan	Central China
S80	BMK130724-562_db	Inlace	jiang an da ye zao	South China
S81	BMK130724-562_dc	Inlace	tie ban zhan	Sumbawa
S82	BMK130724-562_dd	Inlace	ding nan dong zhan	Central China
S83	BMK130724-562_de	Jalace	gao jiao gui hua	Central China
S84	BMK130724-562_df	Inlace	chang shou wu xi dao	Central China
S85	BMK130724-562_dg	Inlace	da nuo bai dong	Central China
S86	BMK130724-562_dh	Inlace	lin chuan da ye zao	Northeast China
S87	BMK130724-562_di	Jalace	Shi ban zhan	North China
S88	BMK130724-562_dj	Inlace	Guo zhu	Japan
S89	BMK130724-562_dk	Jalace	Gui zhao he 2	Japan
S90	BMK130724-562_dl	Jalace	Xiao dou	North China
S91	BMK130724-562_dm	Inlace	dong jun zi	Central China
S92	BMK130724-562_dn	Inlace	Gamal	Unknown
S93	BMK130724-562_do	Inlace	bai ke xi nuo	South China
S94	BMK130724-562_dp	Inlace	ba chong shui	Japan
S95	BMK130724-562_dq	Inlace	Jiu yue han	Central China
S96	BMK130724-562_dr	Inlace	Nagabo	Taiwan
S97	BMK130724-562_ds	Inlace	Bai hua er	South China
S98	BMK130724-562_dt	Inlace	Bai yin 3	South China
S99	BMK130724-562_du	Inlace	hou ma	Yunnan-Kweichow Plateau
S100	BMK130724-562_dv	Inlace	ya geng mi	South China
S101	BMK130724-562_dw	Inlace	hei nuo	South China
S102	BMK130724-562_dx	Inlace	da gu zao	Central China
S103	BMK130724-562_dy	Inlace	bai zhan gu	Central China
S104	BMK130724-562_dz	Inlace	yun nan bai	Central China
S105	BMK130724-562_ea	Jalace	Daeri	Celebes
S106	BMK130724-562_eb	Inlace	Liao yang ben di 4	Central China
S107	BMK130724-562_ec	Jalace	ao guo5-B	Japan
S108	BMK130724-562_ed	Jalace	Ben dao	North China
S109	BMK130724-562_ee	Jalace	Bi jie ma wei hong gu	Yunnan-Kweichow Plateau
S110	BMK130724-562_ef	Inlace	Hong ben dao	Unknown
S111	BMK130724-562_eg	Inlace	Hei ju dao	South China
S112	BMK130724-562_eh	Inlace	Long you man dao	South China
S113	BMK130724-562_ei	Inlace	Zhong qi jia qing	Yangtze River region
S114	BMK130724-562_ej	Inlace	Tai nong 46	Central China
S115	BMK130724-562_ek	Inlace	chang xu nuo	South China
S116	BMK130724-562_el	Inlace	Guang fu 1	Taiwan
S117	BMK130724-562_em	Inlace	Nuo mi	North China
S118	BMK130724-562_en	Inlace	He ke da nuo	Central China
S119	BMK130724-562_eo	Inlace	yang chang xian	South China
S120	BMK130724-562_ep	Inlace	Dong zhu 2	South China
S121	BMK130724-562_eq	Inlace	xi miao gu	South China
S122	BMK130724-562_er	Inlace	186-zao guan yin zhan	Central China
S123	BMK130724-562_es	Inlace	da nuo	South China
S124	BMK130724-562_et	Inlace	lao wu gu	Yangtze River region
S125	BMK130724-562_eu	Inlace	si chuan zhan	Central China
S126	BMK130724-562_ev	Inlace	Sheng fang da bai gu	North China
S127	BMK130724-562_ew	Inlace	ben dao	North China
S128	BMK130724-562_ex	Inlace	ba shi zi	Central China
S129	BMK130724-562_ey	Inlace	Hui bei zi	Yangtze River region
S130	BMK130724-562_ez	Inlace	Huang ke zao 2	South China
S131	BMK130724-562_fa	Jalace	tie geng yi shi ao	Central China
S132	BMK130724-562_fb	Inlace	San pai zhong	South China
S133	BMK130724-562_fc	Inlace	Kai xuan	Northeast China
S134	BMK130724-562_fd	Inlace	Da liu tiao dao	Yangtze River region
S135	BMK130724-562_fe	Inlace	Xin xian li	Central China
S136	BMK130724-562_ff	Inlace	Bei jing jiang mi	North China
S137	BMK130724-562_fg	Inlace	nuo	South China
S138	BMK130724-562_fh	Inlace	Bnlastog	Low latitude region
S139	BMK130724-562_fi	Inlace	Yin 2 dong 7	South China
S140	BMK130724-562_fj	Inlace	hong gen da mi	Yangtze River region
S141	BMK130724-562_fk	Inlace	wu ke nuo	Central China
S142	BMK130724-562_fl	Inlace	chang mang hei ma zao	Yunnan
S143	BMK130724-562_fm	Inlace	bai xu	South China
S144	BMK130724-562_fn	Inlace	mao he	Yangtze River region
S145	BMK130724-562_fo	Inlace	da tou ying	Central China
S146	BMK130724-562_fp	Inlace	tie gu pao	Yangtze River region
S147	BMK130724-562_fq	Inlace	xin ban chang ke zi	Central China
S148	BMK130724-562_fr	Inlace	su zhou zhan	Central China
S149	BMK130724-562_fs	Inlace	xi zi zhan	South China
S150	BMK130724-562_ft	Inlace	da bai cao	North China
